# Supplementary material for: Synthesis of Terpyridine End-Modified Polystyrenes through ATRP for Facile Construction of Metallo-Supramolecular P3HT-b-PS Diblock Copolymers
Source: MDPI journal article supplement (doi:10.3390/polym12122842), 2020-11-29
Supplement: s1 [file s1]

## Supporting Information

# Synthesis of Terpyridine End-modified Polystyrenes through ATRP for Facile Construction of Metallo-supramolecular P3HT-*b*-PS Diblock Copolymers

Tsung-Han Tu and Yi-Tsu Chan\*

Department of Chemistry, National Taiwan University, Taipei 10617, Taiwan; [d02223101@ntu.edu.tw](mailto:d02223101@ntu.edu.tw) (T.-H.T.)

\* Correspondence: [ytchan@ntu.edu.tw](mailto:ytchan@ntu.edu.tw) (Y.-T.C.)

### Table of Contents

|                                                                       |     |
|-----------------------------------------------------------------------|-----|
| 1. Synthesis and Characterization of Metallo-initiator for ATRP ..... | S2  |
| 2. Synthesis and Characterization of TPY-Functionalized PS .....      | S6  |
| 3. Synthesis and Characterization of <b>P3HT</b> <sub>54</sub> .....  | S12 |
| 4. Crystal Data .....                                                 | S18 |
| References .....                                                      | S20 |

## 1. Synthesis and Characterization of Metallo-initiator for ATRP

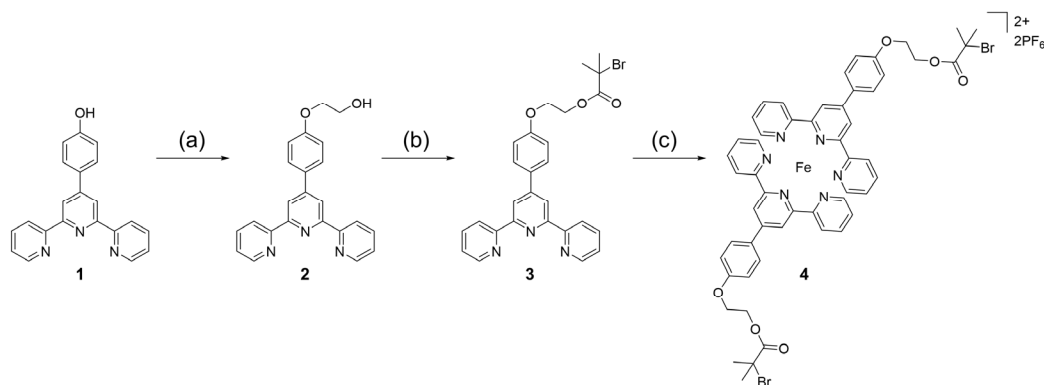

**Scheme S1.** Synthesis of metallo-initiator **4**. *Reagents and conditions:* (a)  $\text{K}_2\text{CO}_3$ , DMF, 2-chloroethanol, 50 °C; (b)  $\text{NEt}_3$ ,  $\alpha$ -bromoisobutyryl bromide, DCM, 0 °C; (c) 1)  $\text{FeCl}_2$ ,  $\text{MeOH}/\text{CHCl}_3$ , r.t., 2)  $\text{NH}_4\text{PF}_6$ .

**Compound 2.** To a DMF (45 mL) solution of **1** (1.9 g, 5.8 mmol) and  $\text{K}_2\text{CO}_3$  (4.8 g, 34.8 mmol), 2-chloroethanol (778.4  $\mu\text{L}$ , 11.6 mmol) was added at room temperature. After being stirred at 50 °C for 18 h, the reaction mixture was extracted with ethyl acetate, and the combined organic extract was washed with  $\text{H}_2\text{O}$ , dried over anhydrous  $\text{MgSO}_4$ , and then evaporated to dryness under reduced pressure. The crude product was recrystallized from MeOH to give **2** as a white solid (1.1 g, 3.0 mmol) in 51% yield.  $^1\text{H}$  NMR (400 MHz,  $\text{CDCl}_3$ ):  $\delta$  (ppm) 8.71 (d,  $J$  = 4.7 Hz, 2H), 8.69 (s, 2H), 8.65 (d,  $J$  = 8.0, 2H), 7.82–7.90 (m, 4H), 7.34 (dd,  $J$  = 7.7, 4.6 Hz, 2H), 7.03 (d,  $J$  = 8.2 Hz, 2H), 4.15 (t,  $J$  = 4.4 Hz, 2H), and 4.00 (td,  $J$  = 4.7, 4.6 Hz, 2H).  $^{13}\text{C}$  NMR (100 MHz,  $\text{CDCl}_3$ ):  $\delta$  (ppm) 159.53, 156.34, 155.85, 149.66, 149.09, 136.86, 131.24, 128.61, 123.78, 121.37, 118.31, 114.91, 69.29, and 61.47. MALDI-TOF-MS: calcd for  $\text{C}_{23}\text{H}_{20}\text{N}_3\text{O}_2$   $[\text{M} + \text{H}]^+$ :  $m/z$  = 370.1556; found: 370.1678.

**Compound 3.** To a DCM (20 mL) solution of **2** (200.0 mg, 541.4  $\mu\text{mol}$ ) and  $\text{NEt}_3$  (0.1 mL, 0.8 mmol),  $\alpha$ -bromoisobutyryl bromide (86.8  $\mu\text{L}$ , 0.7 mmol) was added at 0 °C. After being stirred at room temperature for 22 h, the reaction mixture was extracted with  $\text{CH}_2\text{Cl}_2$  and  $\text{H}_2\text{O}$ . The combined organic extract was washed with  $\text{H}_2\text{O}$ , dried over anhydrous  $\text{MgSO}_4$ , and then evaporated to dryness under reduced pressure. The crude product was recrystallized from MeOH to give **3** as a white solid (227.3 mg, 438.5  $\mu\text{mol}$ ) in 81% yield.  $^1\text{H}$  NMR (400 MHz,  $\text{CDCl}_3$ ):  $\delta$  (ppm) 8.73 (d,  $J$  = 4.6, 2H), 8.70 (s, 2H), 8.67 (d,  $J$  = 8.0, 2H), 7.86 (m, 4H), 7.35 (dd,  $J$  = 7.6, 5.4 Hz, 2H), 7.03 (d,  $J$  = 8.8 Hz, 2H), 4.57 (t,  $J$  = 4.9, 2H), 4.31 (t,  $J$  = 4.8, 2H), and 1.94 (s, 6H).  $^{13}\text{C}$  NMR (100 MHz,  $\text{CDCl}_3$ ):  $\delta$  (ppm) 171.69, 159.38, 156.31, 155.84, 149.61, 149.08, 136.87, 131.38, 128.60, 123.78, 121.37, 118.31, 115.08, 65.73, 64.17, 55.48, and 30.73. MALDI-TOF-MS: calcd for  $\text{C}_{27}\text{H}_{25}\text{BrN}_3\text{O}_3$   $[\text{M} + \text{H}]^+$ :  $m/z$  = 518.1079; found: 518.1349.

**Compound 4.** To a  $\text{CHCl}_3$  (5.0 mL) solution of **3** (50.0 mg, 96.4  $\mu\text{mol}$ ),  $\text{FeCl}_2$  (6.1 mg, 48.2  $\mu\text{mol}$ ) in MeOH (5.0 mL) was added. After being stirred at room temperature for 30 min, an excess amount of  $\text{NH}_4\text{PF}_6$  (157.1 mg, 964.0  $\mu\text{mol}$ ) was added to precipitate the counterion-exchanged complex, and then the mixture was stirred for an additional 30 min. The precipitate was filtered, washed with  $\text{H}_2\text{O}$ , and dried *in vacuo* to give **4** as a dark purple powder (66.6 mg, 48.1  $\mu\text{mol}$ ) in 99% yield.  $^1\text{H}$  NMR (400 MHz,  $\text{CD}_3\text{CN}$ ):  $\delta$  (ppm) 9.08 (s, 4H), 8.54 (d,  $J$  = 8.0 Hz, 4H), 8.24 (d,  $J$  = 8.8 Hz, 4H), 7.84 (dd,  $J$  = 8.5, 7.0 Hz, 4H), 7.30 (d,  $J$  = 8.7 Hz, 4H), 7.13 (d,  $J$  = 5.5 Hz, 4H), 7.02 (dd,  $J$  = 7.3, 5.9 Hz, 4H), 4.57 (t,  $J$  = 4.5 Hz, 4H), 4.42 (t,  $J$  = 4.5 Hz, 4H), and 1.94 (s, 12H).  $^{13}\text{C}$  NMR (100 MHz,  $\text{CD}_3\text{CN}$ ):  $\delta$  (ppm) 172.86, 162.39, 161.65, 159.61, 154.55, 151.37, 140.13,

130.91, 130.69, 128.69, 125.19, 122.40, 117.36, 67.79, 65.61, 57.90, and 31.51. ESI-MS: calcd for  $C_{54}H_{48}Br_2FeN_6O_6 [M - 2PF_6]^{2+}$ :  $m/z = 546.0699$ ; found: 546.0760.

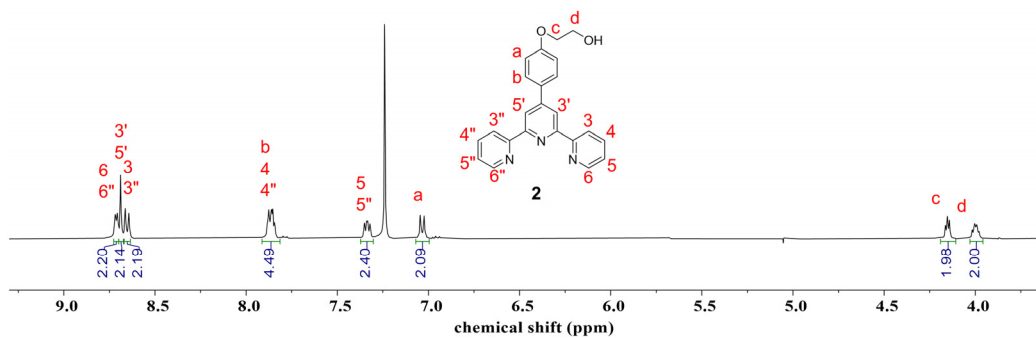

**Figure S1.**  $^1H$  NMR spectrum of **2** in  $CDCl_3$ .

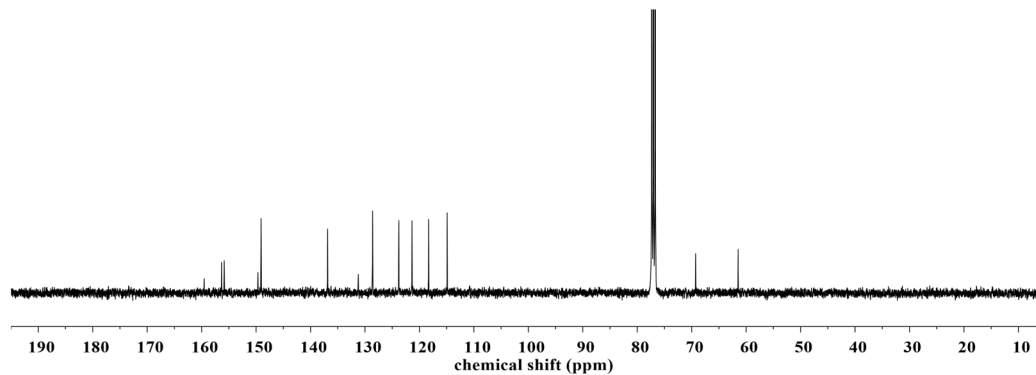

**Figure S2.**  $^{13}C$  NMR spectrum of **2** in  $CDCl_3$ .

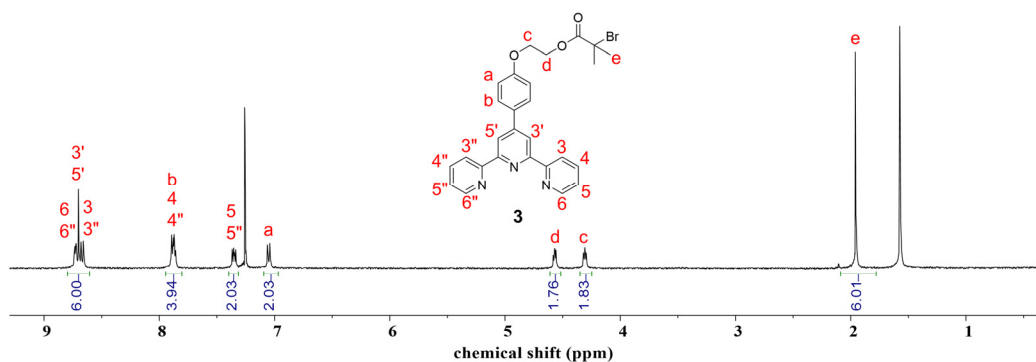

**Figure S3.**  $^1H$  NMR spectrum of **3** in  $CDCl_3$ .

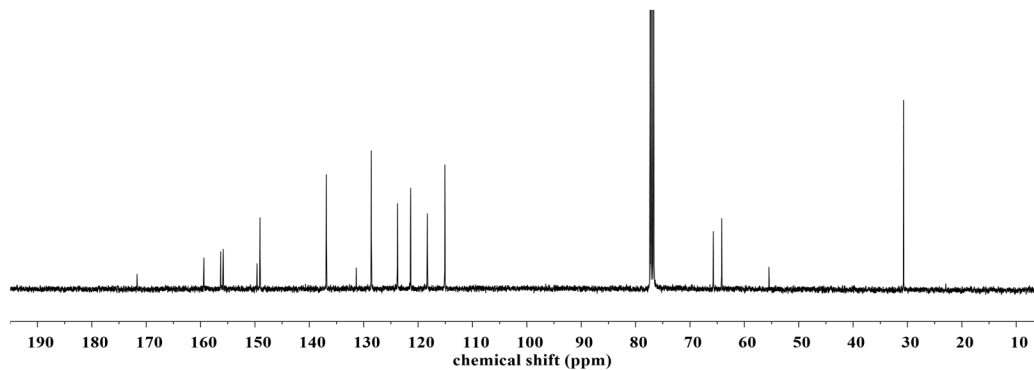

Figure S4.  $^{13}\text{C}$  NMR spectrum of **3** in  $\text{CDCl}_3$ .

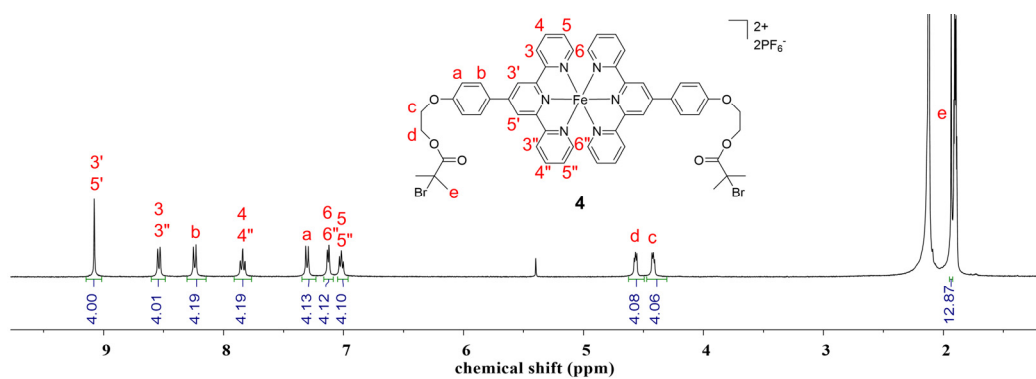

Figure S5.  $^1\text{H}$  NMR spectrum of **4** in  $\text{CD}_3\text{CN}$ .

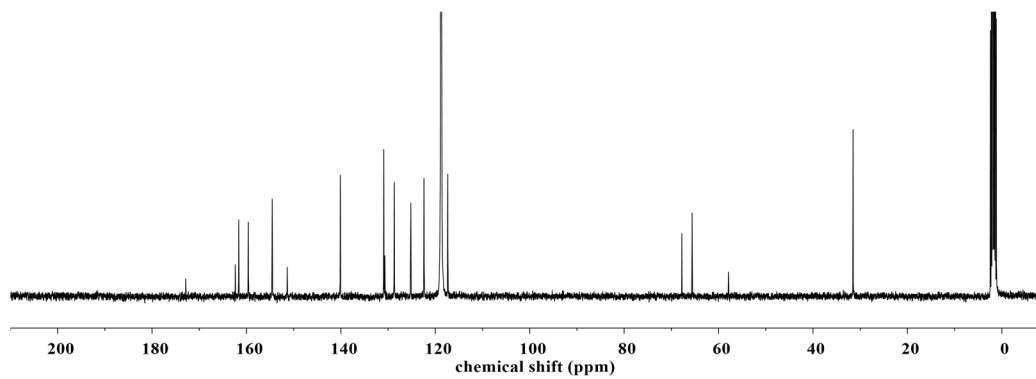

Figure S6.  $^{13}\text{C}$  NMR spectrum of **4** in  $\text{CD}_3\text{CN}$ .

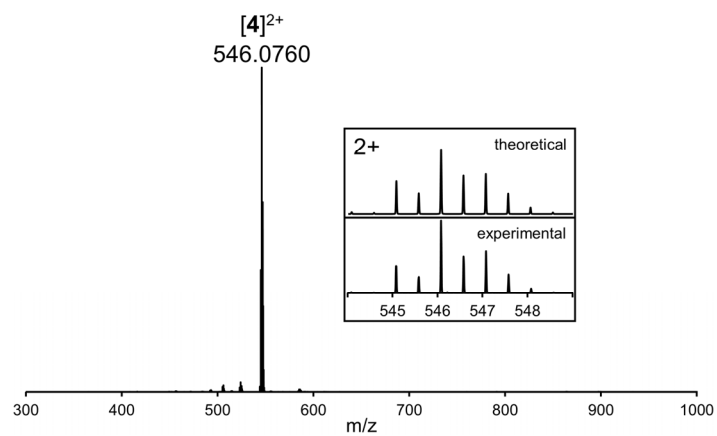

**Figure S7.** ESI-MS spectrum of **4**.

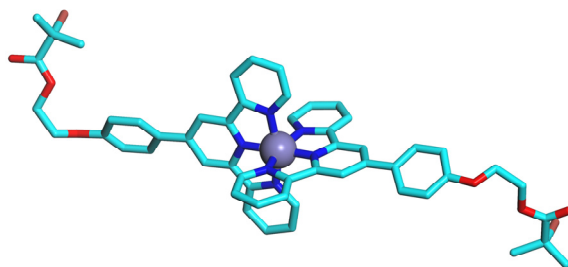

**Figure S8.** X-ray crystal structure of **4** (cyan, carbon; blue, nitrogen; red, oxygen; purple, iron; brown, bromine). Hydrogen atoms and  $PF_6^-$  ions are omitted for clarity.

## 2. Synthesis and Characterization of TPY-Functionalized PS

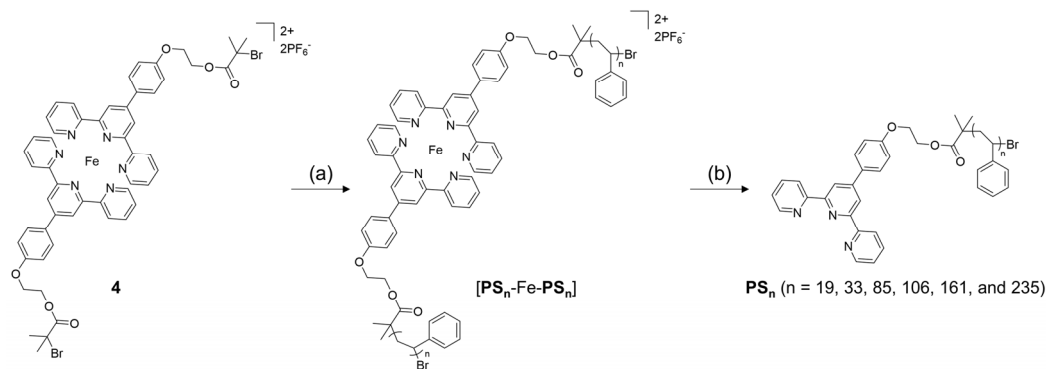

**Scheme S2.** Synthesis of tpy-functionalized polystyrene  $\text{PS}_n$  ( $n = 19, 33, 85, 106, 161, \text{ and } 235$ ) from the metallo-initiator **4**. *Reagents and conditions:* (a) styrene,  $\text{CuBr}$ ,  $\text{PMDETA}$ ,  $\text{MeCN}$ ,  $110^\circ\text{C}$ ; (b)  $\text{EDTA}$ ,  $\text{DMF}$ ,  $25^\circ\text{C}$ .

**PS<sub>19</sub>.** To a degassed Schlenk flask containing  $\text{CuBr}$  (46.7 mg,  $325.8\ \mu\text{mol}$ ) and **4** (150.1 mg,  $108.6\ \mu\text{mol}$ ), the pre-degassed styrene (1.2 mL,  $10.9\ \text{mmol}$ ) and  $\text{MeCN}$  ( $466.0\ \mu\text{L}$ ) were added. The flask was further degassed by three freeze-pump-thaw cycles, and then  $\text{PMDETA}$  ( $68.0\ \mu\text{L}$ ,  $325.8\ \mu\text{mol}$ ) was added. After stirring at  $110^\circ\text{C}$  for 60 min, the reaction mixture was cooled to room temperature and then exposed to air. An excess amount of  $\text{TEA-EDTA}$  in  $\text{DMF}$  was added to the mixture, which was subsequently stirred at  $25^\circ\text{C}$  for 1 day. The reaction mixture was poured into  $\text{MeOH}$  and the precipitate was filtered and dried *in vacuo* to afford **PS<sub>19</sub>** as a white powder (467.2 mg).  $^1\text{H NMR}$  (400 MHz,  $\text{CDCl}_3$ ):  $\delta$  8.75–8.61 (m, 6H), 7.92–7.79 (m, 4H), 7.36 (dd,  $J = 7.4, 5.1$ , 2H), 7.23–6.86 (br, 57H), 6.86–6.26 (br, 38H), 3.97–3.79 (br, 4H), and 2.28–1.14 (br, 57H). GPC:  $M_n = 1,900\ \text{Da}$ ,  $M_w/M_n = 1.14$ .

**PS<sub>33</sub>.** By a similar procedure to that for **PS<sub>19</sub>**, **PS<sub>33</sub>** was obtained as a white powder (862.0 mg) from  $\text{CuBr}$  (40.3 mg,  $280.8\ \mu\text{mol}$ ), **4** (129.4 mg,  $93.6\ \mu\text{mol}$ ), styrene (2.1 mL,  $18.7\ \text{mmol}$ ),  $\text{MeCN}$  ( $0.7\ \text{mL}$ ), and  $\text{PMDETA}$  ( $58.6\ \mu\text{L}$ ,  $280.8\ \mu\text{mol}$ ). The polymerization was conducted at  $110^\circ\text{C}$  for 2 h before quenched.  $^1\text{H NMR}$  (400 MHz,  $\text{CDCl}_3$ ):  $\delta$  8.75–8.63 (m, 6H), 7.90–7.80 (m, 4H), 7.33 (dd,  $J = 7.1, 4.9$ , 2H), 7.23–6.84 (br, 99H), 6.84–6.22 (br, 66H), 3.98–3.82 (br, 4H), and 2.10–1.17 (br, 99H). GPC:  $M_n = 3,600\ \text{Da}$ ,  $M_w/M_n = 1.13$ .

**PS<sub>85</sub>.** By a similar procedure to that for **PS<sub>19</sub>**, **PS<sub>85</sub>** was obtained as a white powder (530.0 mg) from  $\text{CuBr}$  (20.3 mg,  $141.3\ \mu\text{mol}$ ), **4** (65.1 mg,  $47.1\ \mu\text{mol}$ ), styrene (1.1 mL,  $9.4\ \text{mmol}$ ),  $\text{MeCN}$  ( $360\ \mu\text{L}$ ), and  $\text{PMDETA}$  ( $20.3\ \mu\text{L}$ ,  $141.3\ \mu\text{mol}$ ). The polymerization was conducted at  $110^\circ\text{C}$  for 8 h before quenched.  $^1\text{H NMR}$  (400 MHz,  $\text{CDCl}_3$ ):  $\delta$  8.86–8.66 (m, 6H), 8.02–7.86 (m, 4H), 7.49–7.37 (br, 2H), 7.23–6.85 (br, 255H), 6.85–6.25 (br, 170H), 3.98–3.81 (br, 4H), and 2.41–1.06 (br, 255H). GPC:  $M_n = 7,900\ \text{Da}$ ,  $M_w/M_n = 1.21$ .

**PS<sub>106</sub>.** By a similar procedure to that for **PS<sub>19</sub>**, **PS<sub>106</sub>** was obtained as a white powder (463.1 mg) from  $\text{CuBr}$  (9.3 mg,  $64.8\ \mu\text{mol}$ ), **4** (29.9 mg,  $21.6\ \mu\text{mol}$ ), styrene (1.0 mL,  $8.6\ \text{mmol}$ ),  $\text{MeCN}$  ( $498.6\ \mu\text{L}$ ), and  $\text{PMDETA}$  ( $13.5\ \mu\text{L}$ ,  $64.8\ \mu\text{mol}$ ). The polymerization was conducted at  $110^\circ\text{C}$  for 8 h before quenched.  $^1\text{H NMR}$  (400 MHz,  $\text{CDCl}_3$ ):  $\delta$  8.80–8.64 (m, 6H), 7.96–7.80 (m, 4H), 7.42–7.30 (br, 2H), 7.23–6.86 (br, 318H), 6.86–6.19 (br, 212H), 4.03–3.82 (br, 4H), and 2.33–1.12 (br, 318H). GPC:  $M_n = 11,900\ \text{Da}$ ,  $M_w/M_n = 1.14$ .

**PS<sub>161</sub>.** By a similar procedure to that for **PS<sub>19</sub>**, **PS<sub>161</sub>** was obtained as a white powder (613.4 mg) from CuBr (9.3 mg, 64.8  $\mu$ mol), **4** (29.8 mg, 21.6  $\mu$ mol), styrene (2.0 mL, 17.3 mmol), MeCN (990.7  $\mu$ L), and PMDETA (13.5  $\mu$ L, 64.8  $\mu$ mol). The polymerization was conducted at 110 °C for 16 h before quenched. <sup>1</sup>H NMR (400 MHz, CDCl<sub>3</sub>):  $\delta$  8.79–8.66 (m, 6H), 7.94–7.84 (m, 4H), 7.40–7.30 (br, 2H), 7.30–6.88 (br, 483H), 6.88–6.24 (br, 322H), 3.95 (br, 4H), and 2.32–1.18 (br, 483H). GPC:  $M_n$  = 16,200 Da,  $M_w/M_n$  = 1.17.

**PS<sub>235</sub>.** By a similar procedure to that for **PS<sub>19</sub>**, **PS<sub>235</sub>** was obtained as a white powder (1.0 g) from CuBr (9.3 mg, 64.8  $\mu$ mol), **4** (29.8 mg, 21.6  $\mu$ mol), styrene (2.0 mL, 17.3 mmol), and PMDETA (13.5  $\mu$ L, 64.8  $\mu$ mol). The reaction mixture was conducted at 110 °C for 3 h before quenched. <sup>1</sup>H NMR (400 MHz, CDCl<sub>3</sub>):  $\delta$  8.82–8.65 (m, 6H), 7.97–7.83 (m, 4H), 7.40–7.33 (br, 2H), 7.23–6.86 (br, 705H), 6.86–6.25 (br, 470H), 3.99–3.85 (br, 4H), and 2.29–1.14 (br, 705H). GPC:  $M_n$  = 22,000 Da,  $M_w/M_n$  = 1.26.

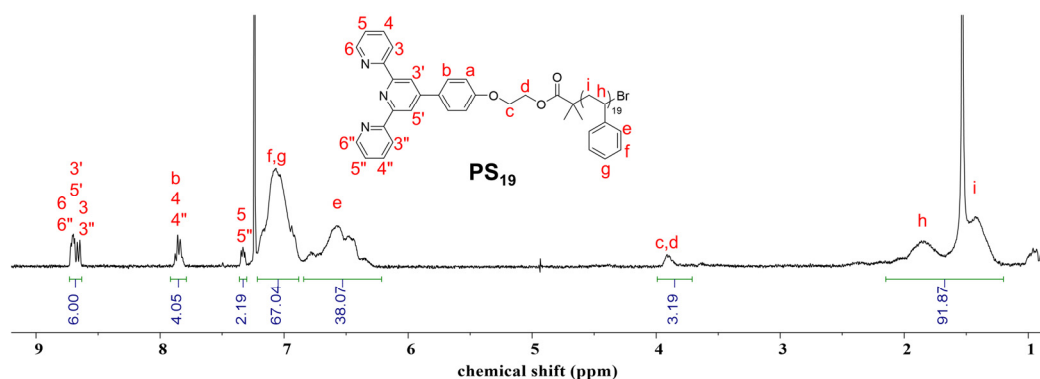

**Figure S9.** <sup>1</sup>H NMR spectrum of **PS<sub>19</sub>** in CDCl<sub>3</sub>.

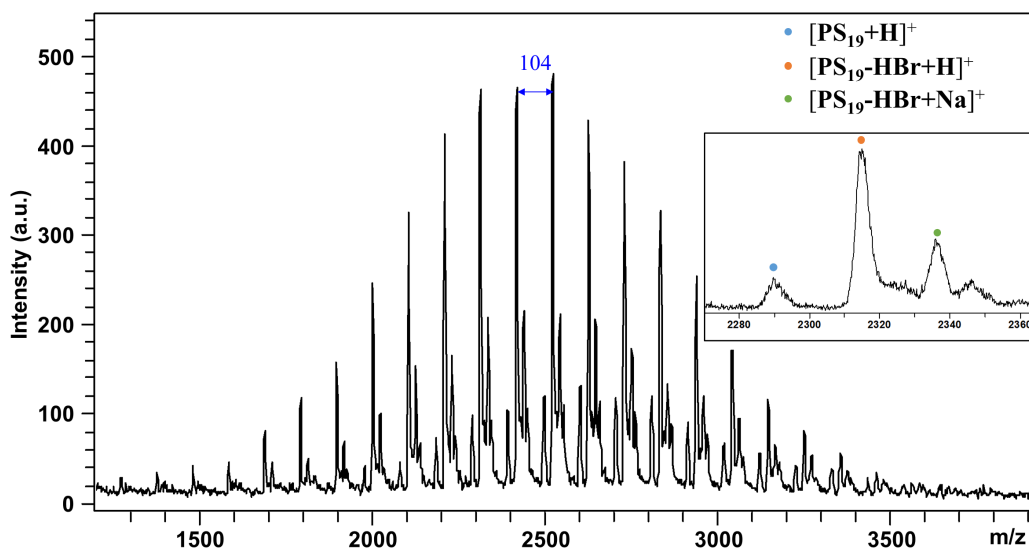

**Figure S10.** MALDI-TOF-MS spectrum of **PS<sub>19</sub>**.

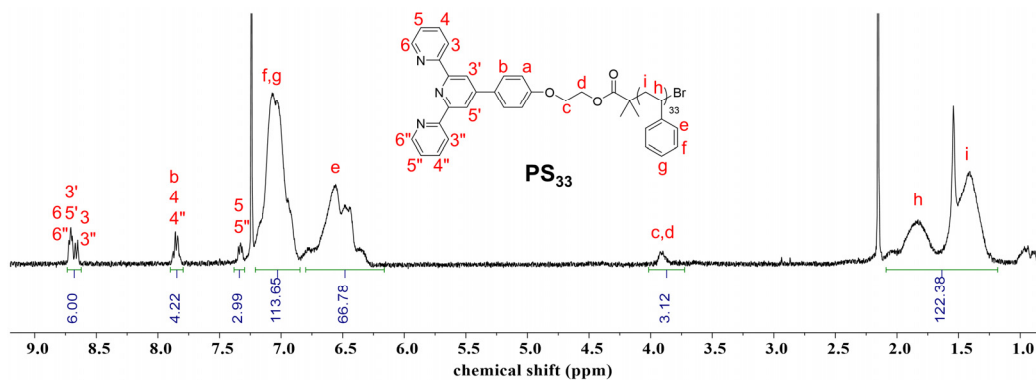

Figure S11.  $^1\text{H}$  NMR spectrum of  $\text{PS}_{33}$  in  $\text{CDCl}_3$ .

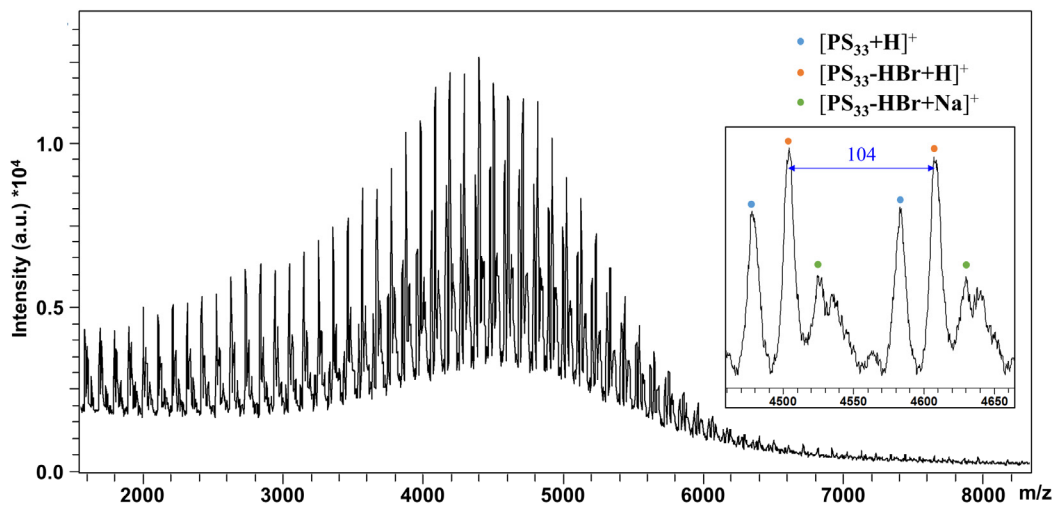

Figure S12. MALDI-TOF-MS spectrum of  $\text{PS}_{33}$ .

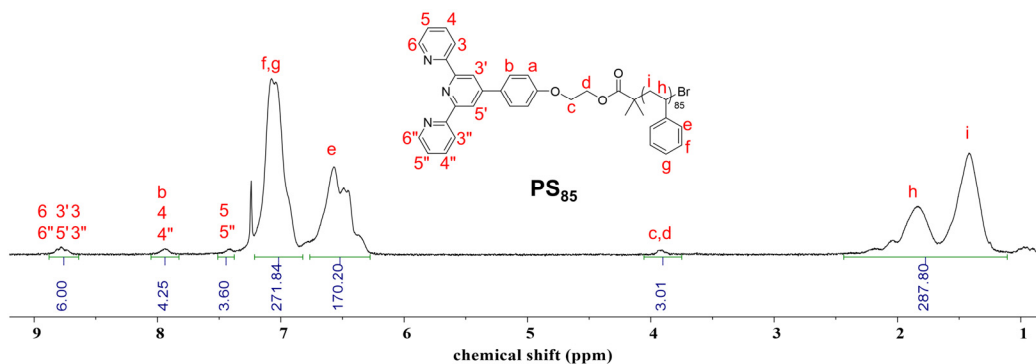

Figure S13.  $^1\text{H}$  NMR spectrum of  $\text{PS}_{85}$  in  $\text{CDCl}_3$ .



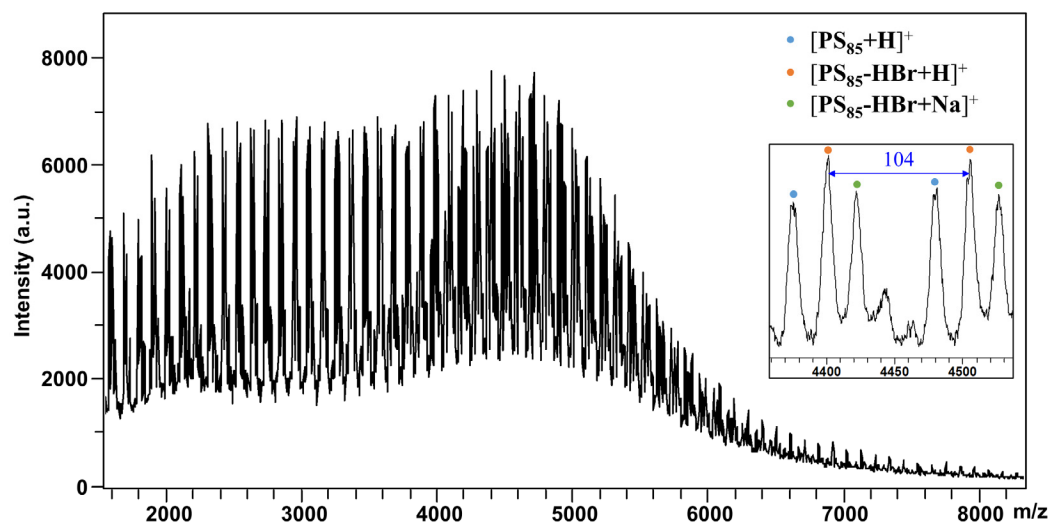

Figure S14. MALDI-TOF-MS spectrum of  $\text{PS}_{85}$ .

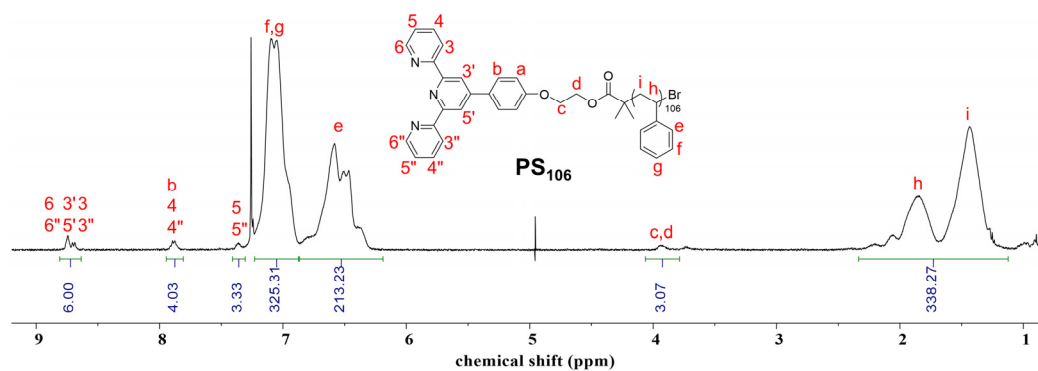

Figure S15.  $^1\text{H}$  NMR spectrum of  $\text{PS}_{106}$  in  $\text{CDCl}_3$ .

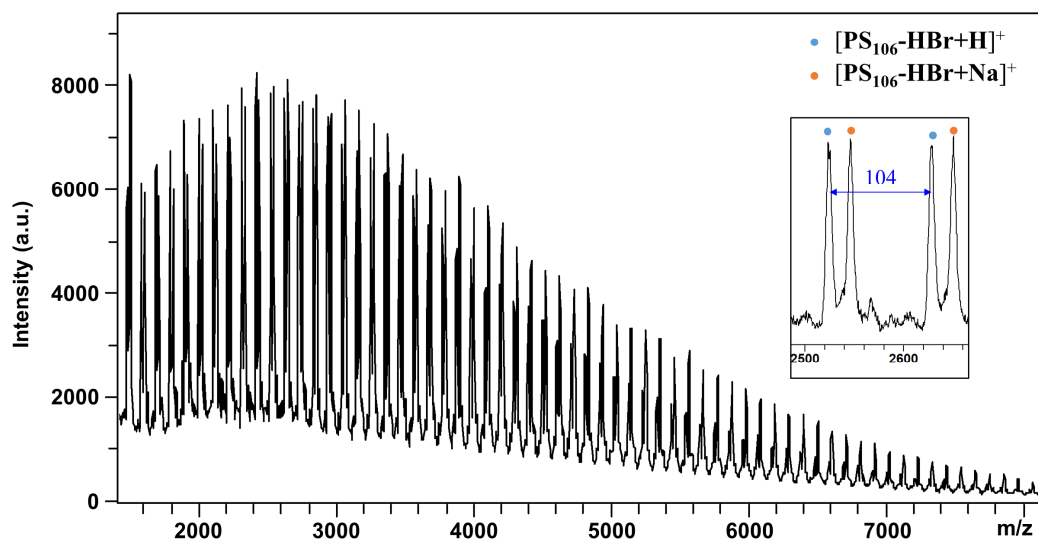

Figure S16. MALDI-TOF-MS spectrum of  $\text{PS}_{106}$ .

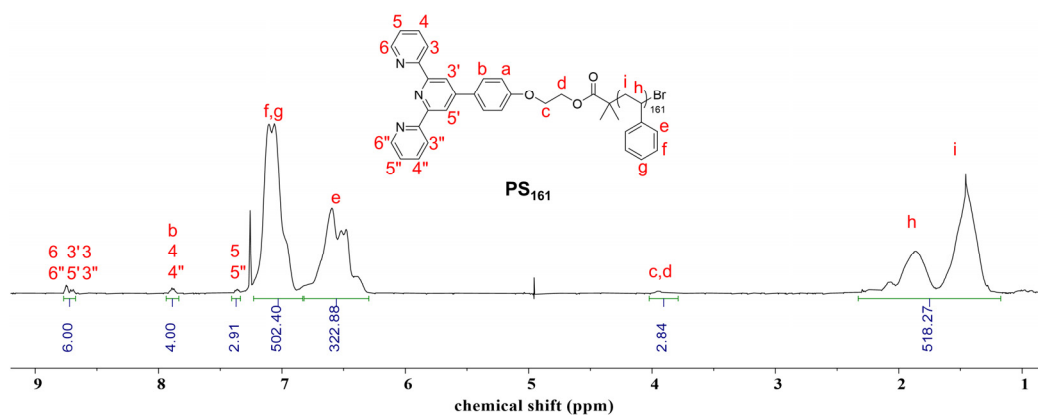

**Figure S17.**  $^1\text{H}$  NMR spectrum of **PS<sub>161</sub>** in  $\text{CDCl}_3$ .

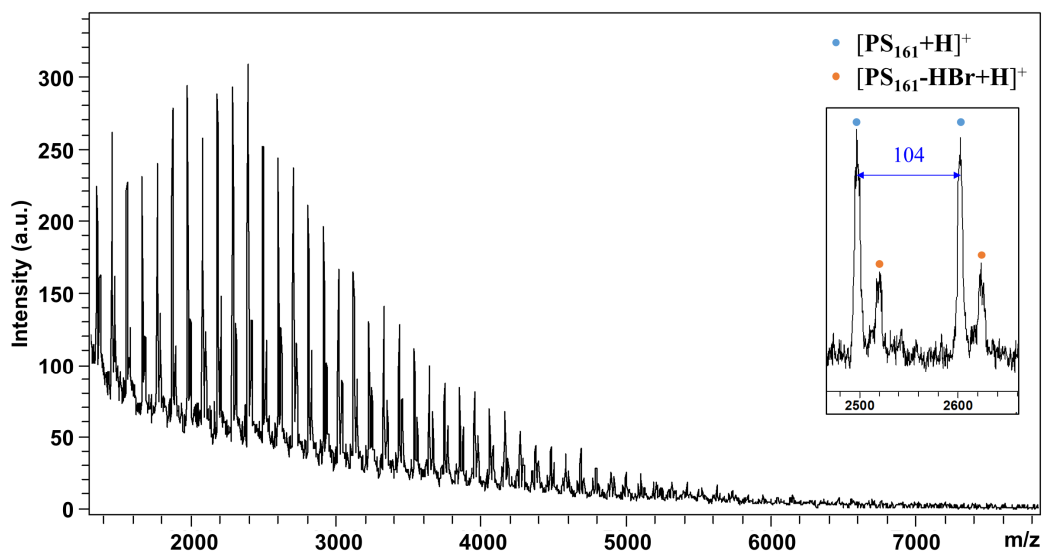

**Figure S18.** MALDI-TOF-MS spectrum of **PS<sub>161</sub>**.

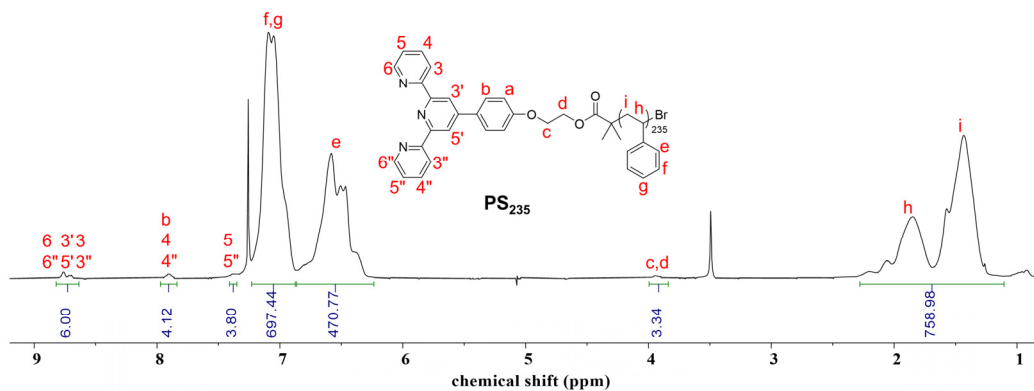

**Figure S19.**  $^1\text{H}$  NMR spectrum of **PS<sub>235</sub>** in  $\text{CDCl}_3$ .

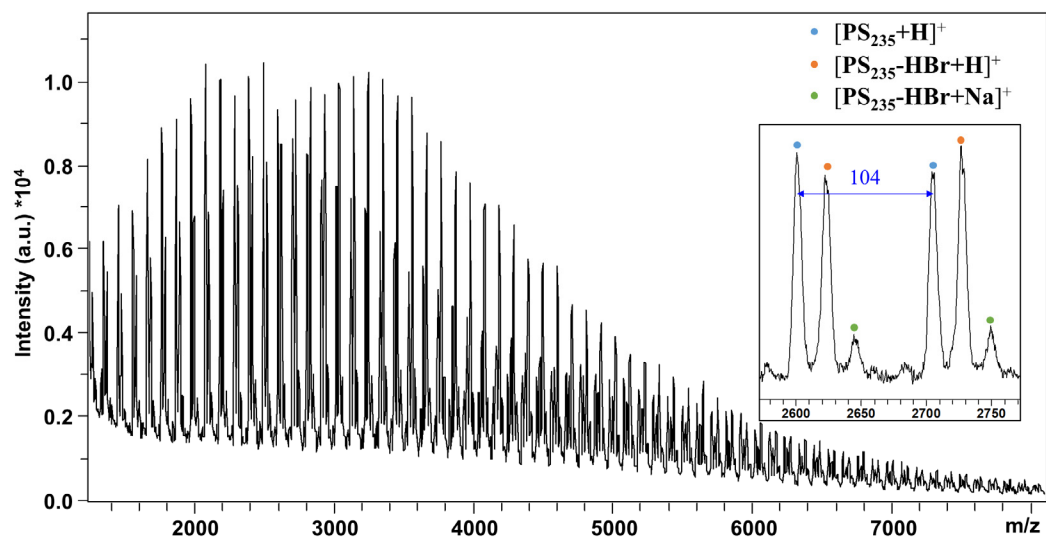

**Figure S20.** MALDI-TOF-MS spectrum of **PS<sub>235</sub>**.

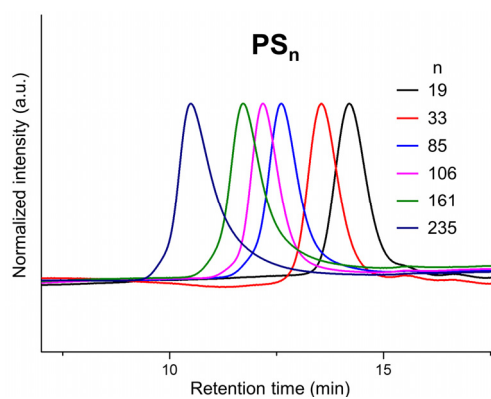

**Figure S21.** GPC traces of **PS<sub>19</sub>** ( $M_n = 1,900$ ,  $M_w/M_n = 1.14$ ), **PS<sub>33</sub>** ( $M_n = 3,600$ ,  $M_w/M_n = 1.13$ ), **PS<sub>85</sub>** ( $M_n = 7,900$ ,  $M_w/M_n = 1.21$ ), **PS<sub>106</sub>** ( $M_n = 11,900$ ,  $M_w/M_n = 1.14$ ), **PS<sub>161</sub>** ( $M_n = 16,200$ ,  $M_w/M_n = 1.17$ ), and **PS<sub>235</sub>** ( $M_n = 22,000$ ,  $M_w/M_n = 1.26$ ).

### 3. Synthesis and Characterization of P3HT<sub>54</sub>

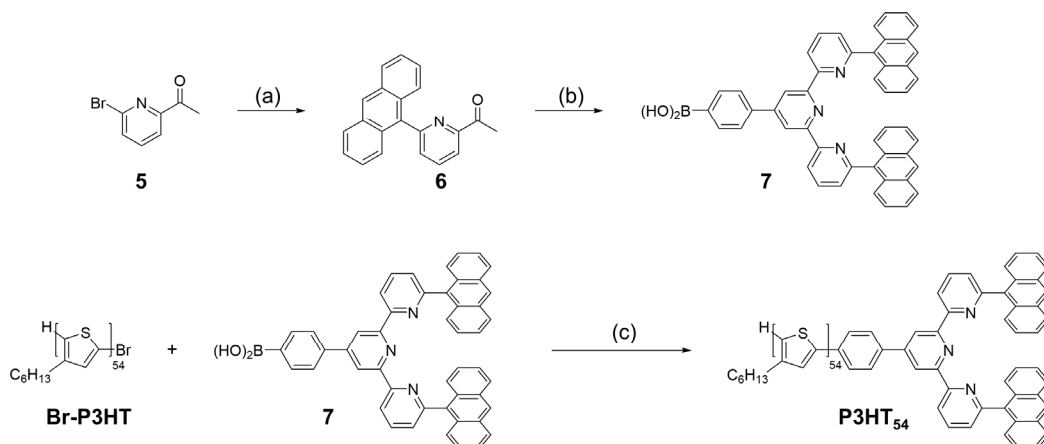

**Scheme S3.** Synthesis of **P3HT<sub>54</sub>**. *Reagents and conditions:* (a) 9-anthraceneboronic acid, Na<sub>2</sub>CO<sub>3</sub>, Pd(PPh<sub>3</sub>)<sub>4</sub>, toluene/H<sub>2</sub>O/*t*-BuOH (3/3/1, v/v/v), reflux; (b) 1) 4-formylphenylboronic acid, NaOH, EtOH, 25 °C, 2) NH<sub>4</sub>OH, reflux; (c) Pd(PPh<sub>3</sub>)<sub>4</sub>, NaOH, THF/H<sub>2</sub>O (3/1, v/v), reflux.

**Compound 6.** To a degassed two-neck flask containing **5** (15.0 g, 75.0 mmol), 9-anthraceneboronic acid (21.6 g, 97.5 mmol), and Na<sub>2</sub>CO<sub>3</sub> (79.5 g, 750.0 mol), a mixed solvent (466.0 mL) of toluene/H<sub>2</sub>O/*t*-BuOH (3/3/1, v/v/v) was added. After being purged with N<sub>2</sub> for 30 min, Pd(PPh<sub>3</sub>)<sub>4</sub> (808.9 mg, 0.7 mmol) was added into the mixture, which was refluxed for 1 day under N<sub>2</sub>. After cooling to 25 °C, the mixture was extracted with CHCl<sub>3</sub>, and the combined organic extract was dried over anhydrous MgSO<sub>4</sub> and then evaporated to dryness under reduced pressure. The residue was recrystallized from MeOH to give **6** as a pale-yellow solid (20.0 g, 9.1 mmol) in 90% yield. <sup>1</sup>H NMR (400 MHz, CDCl<sub>3</sub>): δ (ppm) 8.57 (s, 1H), 8.20 (d, *J* = 8.0 Hz, 1H), 8.10 – 8.00 (m, 3H), 7.65 (d, *J* = 8.1 Hz, 1H), 7.56 (d, *J* = 8.9 Hz, 2H), 7.47 (dd, *J* = 8.5, 7.5 Hz, 2H), 7.37 (dd, *J* = 8.7, 7.1 Hz, 2H), and 2.68 (s, 3H). <sup>13</sup>C NMR (100 MHz, CDCl<sub>3</sub>): δ (ppm) 200.93, 157.90, 154.16, 137.31, 134.63, 131.62, 130.60, 130.24, 128.83, 128.17, 126.27, 126.01, 125.46, 120.44, and 26.25. MALDI-TOF-MS: calcd for C<sub>21</sub>H<sub>16</sub>NO [M + H]<sup>+</sup>: *m/z* = 298.1232; found: 298.1245.

**Compound 7.** To an EtOH (80 mL) solution of **6** (6.1 g, 20.5 mmol), NaOH (820.6 mg, 20.5 mmol) and 4-formylphenylboronic acid (1.4 g, 9.3 mmol) were successively added at 0 °C. After being stirred at 25 °C for 18 h, NH<sub>4</sub>OH(aq) (28 wt%, 25 mL) was added into the mixture, which then was refluxed for 18 h. After cooling to 25 °C, the reaction mixture was filtered and washed with CHCl<sub>3</sub> to afford **7** as a yellow solid (4.0 g, 5.7 mmol) in 61% yield. <sup>1</sup>H NMR (400 MHz, CD<sub>3</sub>OD/CDCl<sub>3</sub> = 4/1, v/v): δ (ppm) 8.90 (d, *J* = 7.8 Hz, 2H), 8.66 (s, 2H), 8.63 (s, 2H), 8.25 (dd, *J* = 7.8, 7.8 Hz, 2H), 8.13 (d, *J* = 8.4 Hz, 4H), 7.70 (d, *J* = 8.8 Hz, 4H), 7.64 (d, *J* = 7.2 Hz, 2H), and 7.54–7.38 (m, 10H). <sup>13</sup>C NMR (100 MHz, CD<sub>3</sub>OD/CDCl<sub>3</sub> = 4/1, v/v): δ (ppm) 159.06, 158.58, 157.19, 153.17, 138.94, 138.85, 136.46, 136.39, 134.79, 132.90, 131.60, 129.83, 129.01, 128.41, 127.43, 127.29, 126.56, 121.99, 120.78, and 119.99. MALDI-TOF-MS: calcd for C<sub>49</sub>H<sub>33</sub>BN<sub>3</sub>O<sub>2</sub> [M + H]<sup>+</sup>: *m/z* = 706.2666; found: 706.2579.

**P3HT<sub>54</sub>.** To a degassed two-neck flask containing **7** (302.1 mg, 428.5 μmol), monobrominated **Br-P3HT** (2.0 g, 219.4 μmol, *M<sub>n</sub>* = 9,100, *M<sub>w</sub>*/*M<sub>n</sub>* = 1.18), and NaOH (2.0 g, 50.0 mmol), a mixed solvent (170 mL) of THF/H<sub>2</sub>O (3/1, v/v) was added. After being purged with N<sub>2</sub> for 30 min, Pd(PPh<sub>3</sub>)<sub>4</sub> (30.5 mg, 26.4 μmol) was added into the mixture, which was then refluxed for 2 days under N<sub>2</sub>. After cooling to room temperature, the mixture was extracted

with  $\text{CHCl}_3$  and the combined organic extract was dried over  $\text{MgSO}_4$  and then evaporated to dryness under reduced pressure. The residue was purified by precipitation from  $\text{CH}_3\text{OH}/\text{CHCl}_3$  to give **P3HT**<sub>54</sub> as a deep purple solid (2.0 g, 248.6  $\mu\text{mol}$ , DP = 54) in 87% yield.  $^1\text{H}$  NMR (400 MHz,  $\text{CDCl}_3$ )  $\delta$  (ppm) 8.92 (m, 2H), 8.73 (s, 2H), 8.59 (s, 2H), 8.21 (m, 2H), 8.16 (m, 4H), 7.76 (m, 4H), 7.67 (m, 2H), 7.56 (s, 2H), 7.47 (s, 4H), 7.41 (s, 6H), 6.98 (s, 54H), 2.79 (s, 108H), 1.71 (s, 108H), 1.30 (d, 324H), and 0.92 (s, 108H). GPC:  $M_n$  = 8,800 Da,  $M_w/M_n$  = 1.23.

**Isomeric structures of P3HT**<sub>54</sub>. The mono-brominated P3HT prepared by GRIM have two kinds of chain ends, namely head-to-head and head-to-tail orientations. The difference could be distinguished by the  $^1\text{H}$  NMR spectra of **P3HT**<sub>54</sub> [1]. The chain-end head-to-tail content is about 22% (Figure S26).

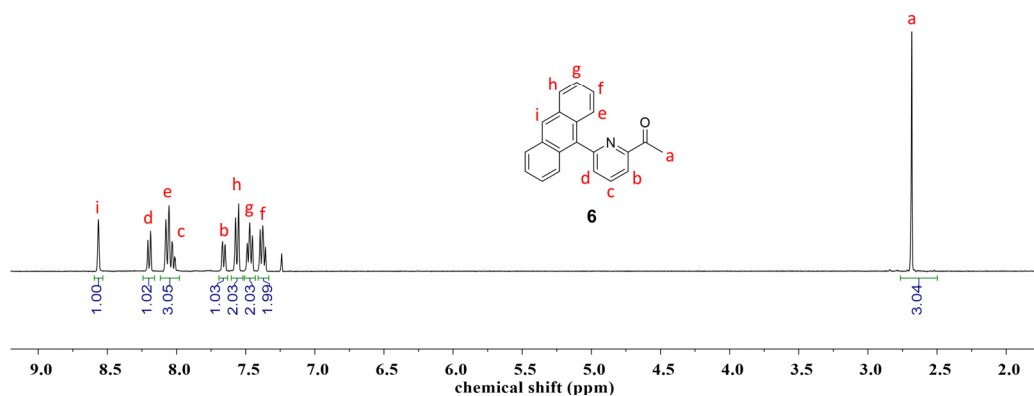

Figure S22.  $^1\text{H}$  NMR spectrum of **6** in  $\text{CDCl}_3$ .

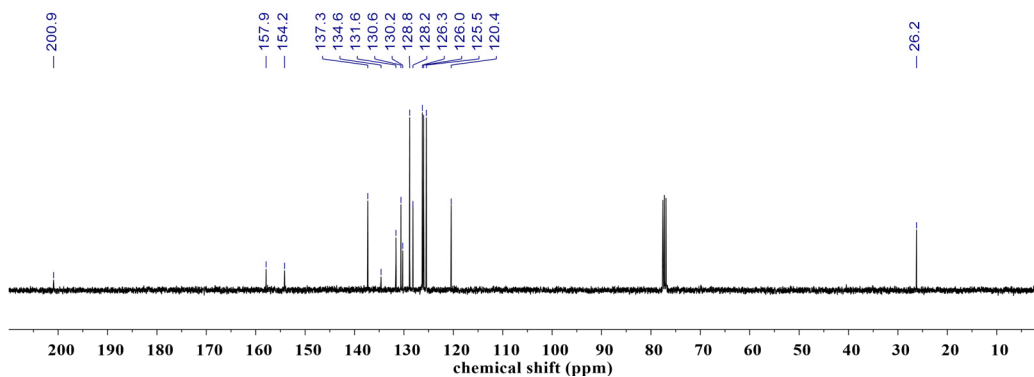

Figure S23.  $^{13}\text{C}$  NMR spectrum of **6** in  $\text{CDCl}_3$ .

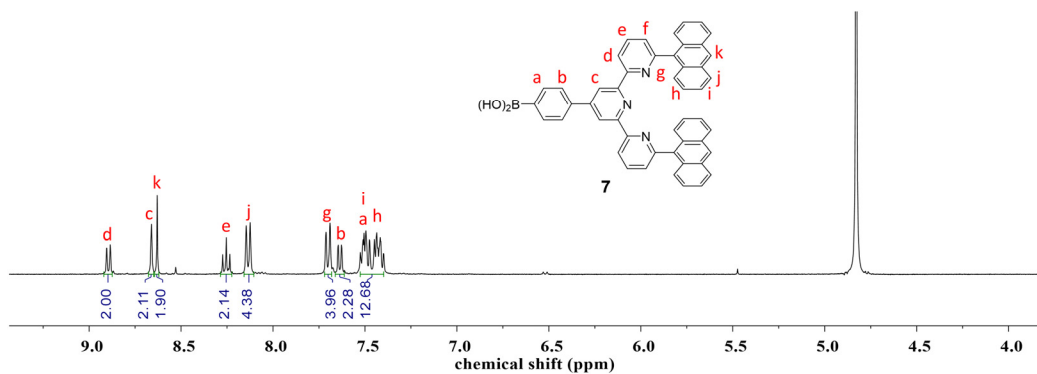

Figure S24.  $^1\text{H}$  NMR spectrum of **7** in  $\text{CD}_3\text{OD}/\text{CDCl}_3$  (4/1, v/v).

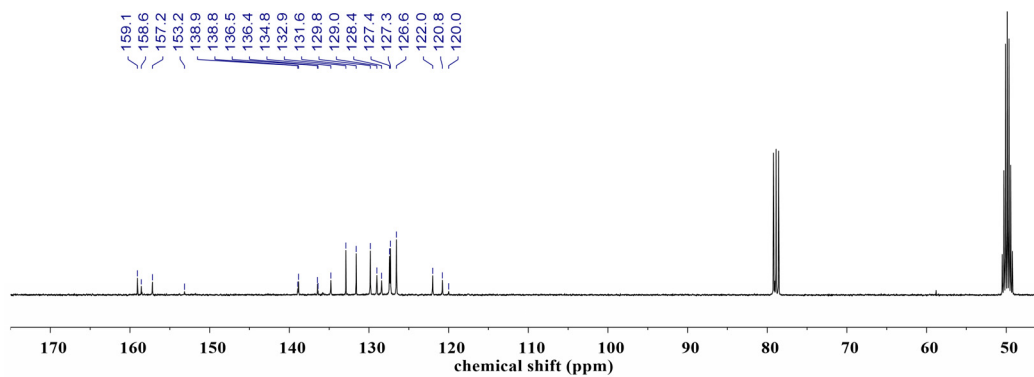

Figure S25.  $^{13}\text{C}$  NMR spectrum of **7** in  $\text{CD}_3\text{OD}/\text{CDCl}_3$  (4/1, v/v).

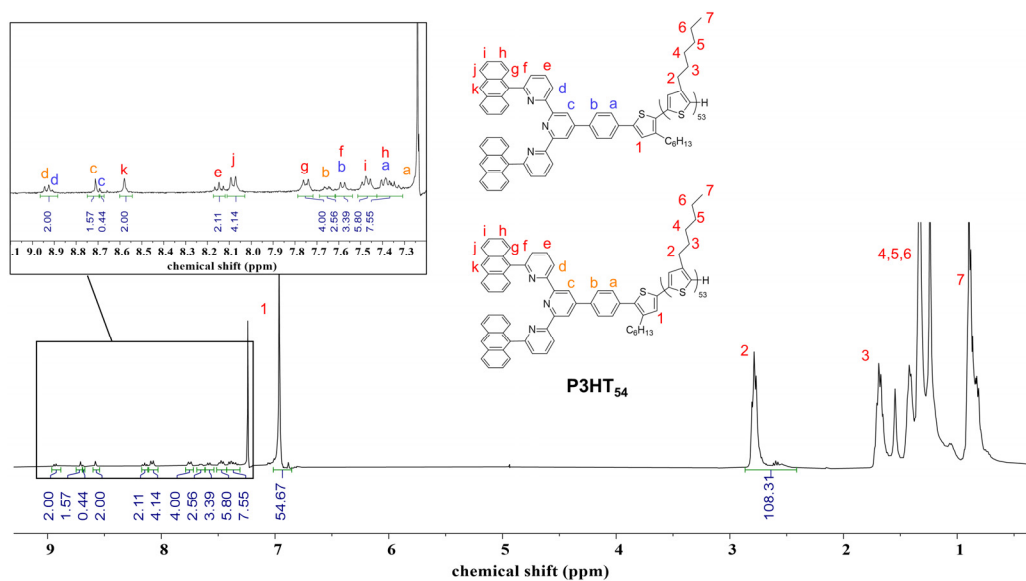

Figure S26.  $^1\text{H}$  NMR spectrum of **P3HT<sub>54</sub>**.

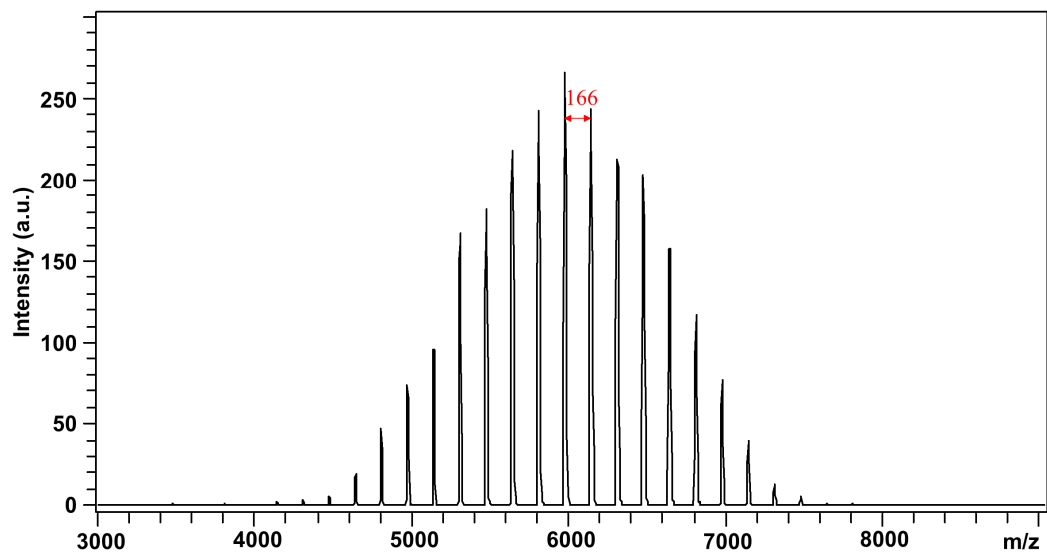

Figure S27.  $^1\text{H}$  NMR spectrum of  $\text{P3HT}_{54}$ .

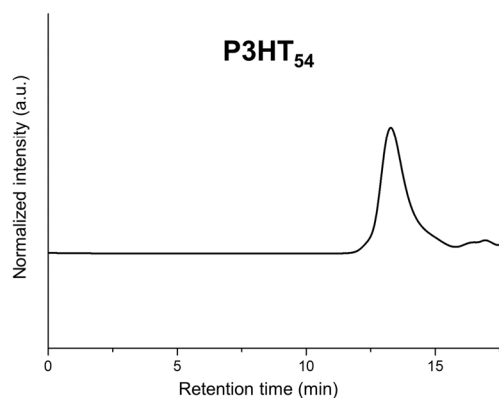

Figure S28. GPC trace of  $\text{P3HT}_{54}$  (THF was used as eluent.  $M_n = 8,800$  Da,  $M_w/M_n = 1.23$ ).

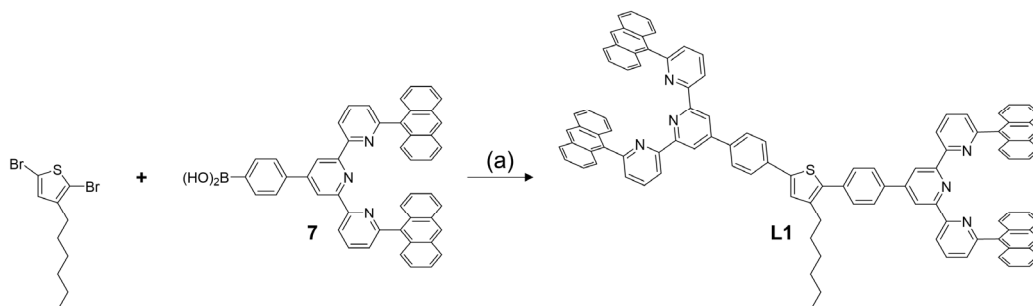

**Scheme S4.** Synthesis of **L1**. Reagents and conditions: (a)  $\text{Na}_2\text{CO}_3$ ,  $\text{Pd}(\text{PPh}_3)_4$ , toluene/ $\text{H}_2\text{O}$ / $t$ -BuOH (3/3/1, v/v/v), reflux.

**Compound L1.** To a degassed two-neck flask containing 2,5-dibromo-3-hexylthiophene (0.2 g, 0.6 mmol), **7** (1.3 g, 1.8 mmol), and  $\text{Na}_2\text{CO}_3$  (2.2 g, 20.7 mmol), a mixed solvent (56 mL) of toluene/ $\text{H}_2\text{O}$ / $t$ -BuOH (3/3/1, v/v/v) was added. After being purged with  $\text{N}_2$  for 30 min,  $\text{Pd}(\text{PPh}_3)_4$  (208.0 mg, 0.2 mmol) was added into the mixture, which was refluxed for 2 days under  $\text{N}_2$ . After cooling to  $25^\circ\text{C}$ , the mixture was extracted with  $\text{CHCl}_3$  and  $\text{H}_2\text{O}$ . The combined organic extract was dried over anhydrous  $\text{MgSO}_4$  and then evaporated to dryness under reduced pressure. The residue was purified by column chromatography ( $\text{Al}_2\text{O}_3$ ,  $\text{CH}_2\text{Cl}_2$ /hexane = 3/1). The crude was recrystallized from MeOH to give **L1** as a yellow solid (757.2 mg, 0.5 mmol) in 83% yield.  $^1\text{H}$  NMR (400 MHz,  $\text{CDCl}_3$ ):  $\delta$  (ppm) 8.93–8.86 (m, 4H), 8.67 (s, 2H), 8.65 (s, 2H), 8.56 (s, 4H), 8.13 (dd,  $J = 8.5, 7.5$  Hz, 4H), 8.06 (d,  $J = 8.1$  Hz, 4H), 7.75–7.70 (m, 8H), 7.76–7.71 (m, 8H), 7.45 (dd,  $J = 8.6, 6.5$  Hz, 8H), 7.41–7.32 (m, 10H), 7.25 (d,  $J = 8.6$ , 2H), 7.00 (s, 1H), 2.43 (t,  $J = 7.8$  Hz, 2H), 1.46–1.37 (m, 2H), 1.31–1.22 (m, 6H), and 1.15–1.03 (m, 3H).  $^{13}\text{C}$  NMR (100 MHz,  $\text{CDCl}_3$ ):  $\delta$  (ppm) 157.60, 157.58, 156.65, 156.61, 156.07, 149.56, 149.47, 141.43, 140.09, 137.03, 137.00, 136.88, 135.55, 135.49, 134.97, 134.61, 131.42, 130.14, 129.20, 128.43, 127.61, 127.53, 127.49, 127.45, 127.36, 127.33, 126.97, 126.32, 126.30, 125.98, 125.78, 125.76, 125.52, 125.15, 119.95, 119.92, 119.26, 119.10, 31.47, 30.72, 29.00, 28.79, 22.43, and 13.95. MALDI-TOF-MS: calcd for  $\text{C}_{108}\text{H}_{75}\text{N}_6\text{S}$  [ $\text{M} + \text{H}$ ] $^+$ :  $m/z = 1487.5773$ ; found: 1487.5695.

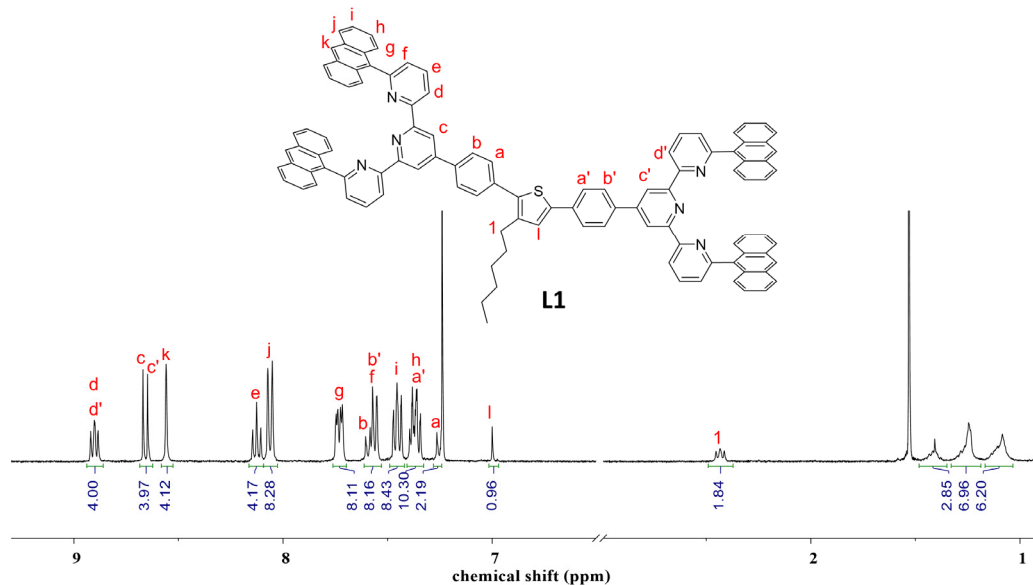

**Figure S29.**  $^1\text{H}$  NMR spectrum of **L1** in  $\text{CDCl}_3$ .



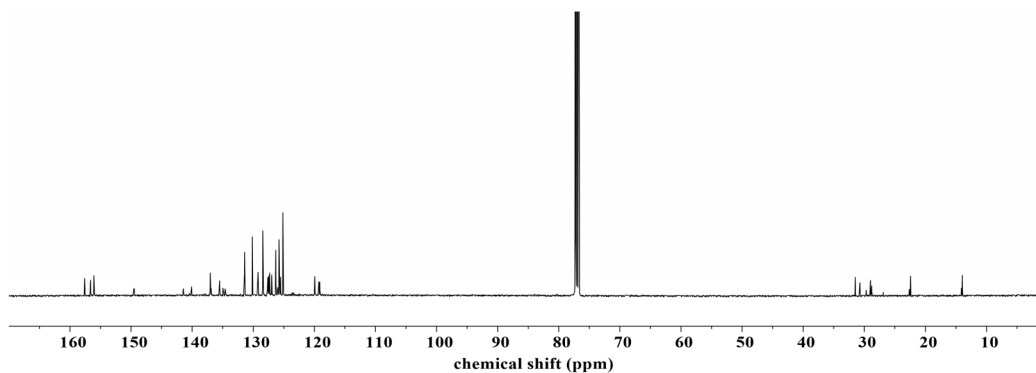

**Figure S30.**  $^{13}\text{C}$  NMR spectrum of **L1** in  $\text{CDCl}_3$ .

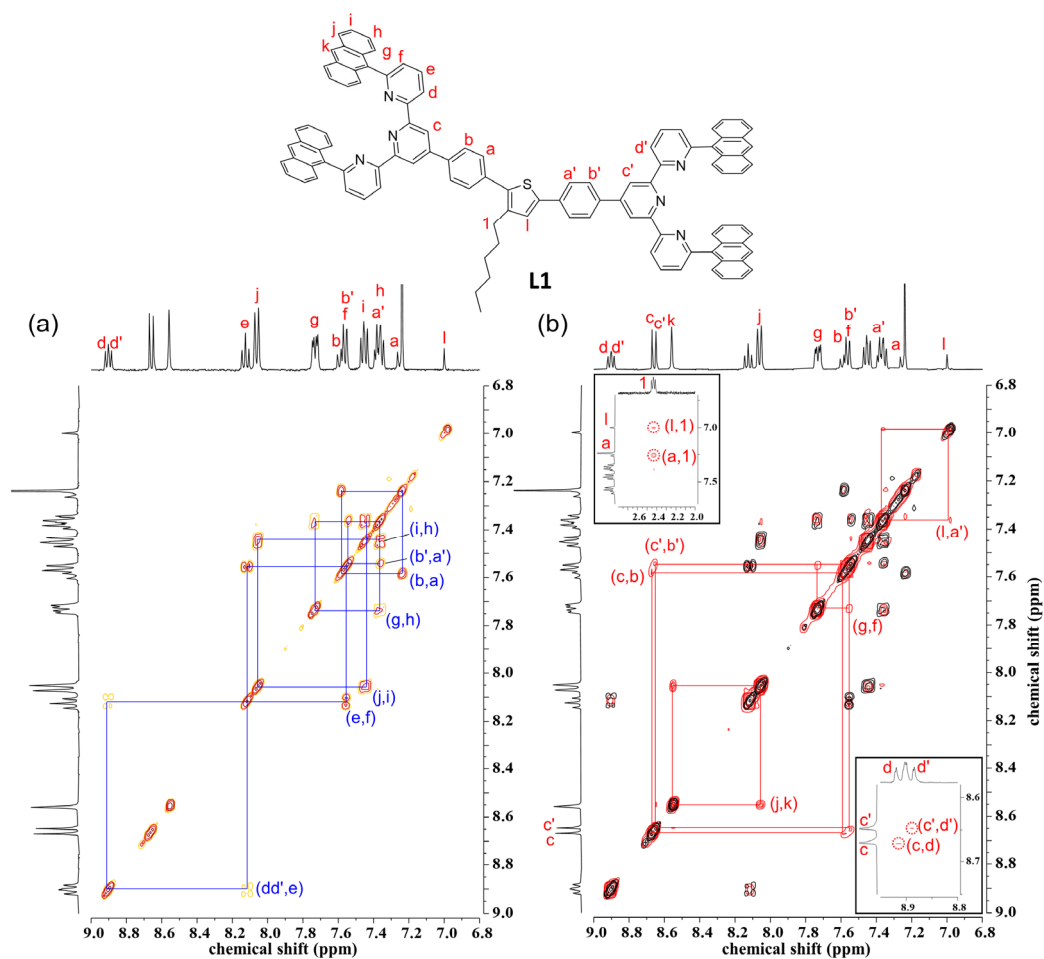

**Figure S31.** (a) COSY NMR spectrum of **L1** in  $\text{CDCl}_3$ . (b) Overlapped NOESY (red) and COSY (black) NMR spectra of **8** (insets: partial NOESY spectra).

#### 4. Crystal data

Crystallographic data were acquired on an Oxford Diffraction Gemini A CCD diffractometer with graphite monochromated Mo-K $\alpha$  radiation ( $\lambda = 0.71073$  Å). The crystal structures of **4** and [L2-Zn-L3] were deposited at the Cambridge Crystallographic Data Center with the deposition numbers of CCDC 2043189 and 2043188, respectively.

**Table S1.** Crystal data and experimental details for metallo-initiator **4**.

|                                      |                                                                                                                |                             |
|--------------------------------------|----------------------------------------------------------------------------------------------------------------|-----------------------------|
| Identification code                  | ic20571                                                                                                        |                             |
| Empirical formula                    | C <sub>54</sub> H <sub>48</sub> Br <sub>2</sub> F <sub>12</sub> FeN <sub>6</sub> O <sub>6</sub> P <sub>2</sub> |                             |
| Formula weight                       | 1382.59                                                                                                        |                             |
| Crystal system                       | Monoclinic                                                                                                     |                             |
| Space group                          | Pn                                                                                                             |                             |
| Unit cell dimensions                 | a = 16.473(2) Å                                                                                                | $\alpha = 90^\circ$ .       |
|                                      | b = 9.0854(7) Å                                                                                                | $\beta = 98.448(8)^\circ$ . |
|                                      | c = 37.973(3) Å                                                                                                | $\gamma = 90^\circ$ .       |
| Volume                               | 5621.5(9) Å <sup>3</sup>                                                                                       |                             |
| Z                                    | 4                                                                                                              |                             |
| F(000)                               | 2784                                                                                                           |                             |
| Density (calculated)                 | 1.634 Mg m <sup>-3</sup>                                                                                       |                             |
| Wavelength                           | 0.71073 Å                                                                                                      |                             |
| Cell parameters reflections used     | 4192                                                                                                           |                             |
| Theta range for Cell parameters      | 3.1550 to 22.2550°.                                                                                            |                             |
| Absorption coefficient               | 1.842 mm <sup>-1</sup>                                                                                         |                             |
| Temperature                          | 100(2) K                                                                                                       |                             |
| Crystal size                         | 0.300 x 0.250 x 0.010 mm <sup>3</sup>                                                                          |                             |
| Data collection                      |                                                                                                                |                             |
| Diffractometer                       | Xcalibur, Atlas, Gemini                                                                                        |                             |
| Absorption correction                | Semi-empirical from equivalents                                                                                |                             |
| Max. and min. transmission           | 1.00000 and 0.68911                                                                                            |                             |
| No. of measured reflections          | 23625                                                                                                          |                             |
| No. of independent reflections       | 14606 [R(int) = 0.0749]                                                                                        |                             |
| No. of observed [ $I > 2\sigma(I)$ ] | 7263                                                                                                           |                             |
| Completeness to theta = 25.242°      | 99.7 %                                                                                                         |                             |
| Theta range for data collection      | 3.136 to 27.499°.                                                                                              |                             |
| Refinement                           |                                                                                                                |                             |
| Final R indices [ $I > 2\sigma(I)$ ] | R1 = 0.0914, wR2 = 0.2037                                                                                      |                             |
| R indices (all data)                 | R1 = 0.2073, wR2 = 0.2762                                                                                      |                             |
| Goodness-of-fit on F <sup>2</sup>    | 1.277                                                                                                          |                             |
| No. of reflections                   | 14606                                                                                                          |                             |
| No. of parameters                    | 1538                                                                                                           |                             |

|                              |                                    |
|------------------------------|------------------------------------|
| No. of restraints            | 519                                |
| Absolute structure parameter | 0.19(2)                            |
| Largest diff. peak and hole  | 1.258 and -1.244 e.Å <sup>-3</sup> |

**Table S2.** Crystal data and experimental details for [L2-Zn-L3].

|                                  |                                                                                                |                             |
|----------------------------------|------------------------------------------------------------------------------------------------|-----------------------------|
| Identification code              | ic20502                                                                                        |                             |
| Empirical formula                | C <sub>78</sub> H <sub>60</sub> F <sub>6</sub> N <sub>6</sub> O <sub>9</sub> S <sub>2</sub> Zn |                             |
| Formula weight                   | 1468.81                                                                                        |                             |
| Crystal system                   | Monoclinic                                                                                     |                             |
| Space group                      | Cc                                                                                             |                             |
| Unit cell dimensions             | a = 24.443(4) Å                                                                                | $\alpha = 90^\circ$ .       |
|                                  | b = 17.210(3) Å                                                                                | $\beta = 124.58(3)^\circ$ . |
|                                  | c = 20.276(4) Å                                                                                | $\gamma = 90^\circ$ .       |
| Volume                           | 7023(3) Å <sup>3</sup>                                                                         |                             |
| Z                                | 4                                                                                              |                             |
| F(000)                           | 3032                                                                                           |                             |
| Density (calculated)             | 1.389 Mg m <sup>-3</sup>                                                                       |                             |
| Wavelength                       | 0.71073 Å                                                                                      |                             |
| Cell parameters reflections used | 3806                                                                                           |                             |
| Theta range for Cell parameters  | 4.0900 to 26.5370°.                                                                            |                             |
| Absorption coefficient           | 0.489 mm <sup>-1</sup>                                                                         |                             |
| Temperature                      | 110(2) K                                                                                       |                             |
| Crystal size                     | 0.20 x 0.15 x 0.10 mm <sup>3</sup>                                                             |                             |

#### Data collection

|                                      |                                 |
|--------------------------------------|---------------------------------|
| Diffractometer                       | Xcalibur, Atlas, Gemini         |
| Absorption correction                | Semi-empirical from equivalents |
| Max. and min. transmission           | 1.00000 and 0.76530             |
| No. of measured reflections          | 16379                           |
| No. of independent reflections       | 10909 [R(int) = 0.0415]         |
| No. of observed [ $I > 2\sigma(I)$ ] | 6767                            |
| Completeness to theta = 25.242°      | 99.5 %                          |
| Theta range for data collection      | 3.115 to 27.498°.               |

#### Refinement

|                                      |                           |
|--------------------------------------|---------------------------|
| Final R indices [ $I > 2\sigma(I)$ ] | R1 = 0.0754, wR2 = 0.1860 |
| R indices (all data)                 | R1 = 0.1281, wR2 = 0.2309 |
| Goodness-of-fit on F <sup>2</sup>    | 1.130                     |
| No. of reflections                   | 10909                     |
| No. of parameters                    | 919                       |

No. of restraints 50  
Absolute structure parameter 0.015(13)  
Largest diff. peak and hole 0.862 and -0.638 e.Å<sup>-3</sup>

## References

1. He, Y.-J.; Tu, T.-H.; Su, M.-K.; Yang, C.-W.; Kong, K.V.; Chan, Y.-T. Facile Construction of Metallo-Supramolecular Poly(3-hexylthiophene)-*block*-Poly(ethylene oxide) Diblock Copolymers via Complementary Coordination and Their Self-Assembled Nanostructures. *J. Am. Chem. Soc.* **2017**, *139*, 4218-4224, doi:10.1021/jacs.7b01010.
